# Supplementary material
Source: Springer Nature journal article supplement (https://www.springermedizin.de/resource/supplementary/13005_2010_192_MOESM1_ESM.pdf/9626458)
Supplement: MOESM1 [file 9626458]

| <b>Statement</b>                                                            | <b>Response</b>                       | <b>Points</b> |
|-----------------------------------------------------------------------------|---------------------------------------|---------------|
| I feel tense or "wound up"                                                  | most of the time                      | 3 [A]         |
|                                                                             | a lot of the time                     | 2             |
|                                                                             | from time to time, occasionally       | 1             |
|                                                                             | not at all                            | 0             |
| I still enjoy the things I used to enjoy                                    | definitely as much                    | 0 [D]         |
|                                                                             | not quite as much                     | 1             |
|                                                                             | only a little                         | 2             |
|                                                                             | hardly at all                         | 3             |
| I get a sort of frightened feeling as if something awful is about to happen | very definitely and quite badly       | 3 [A]         |
|                                                                             | yes, but not too badly                | 2             |
|                                                                             | a little, but it doesn't worry me     | 1             |
|                                                                             | not at all                            | 0             |
| I can laugh and see the funny side of things                                | as much as I always could             | 0 [D]         |
|                                                                             | not quite so much now                 | 1             |
|                                                                             | definitely not so much now            | 2             |
|                                                                             | not at all                            | 3             |
| Worrying thoughts go through my mind                                        | a great deal of the time              | 3 [A]         |
|                                                                             | a lot of the time                     | 2             |
|                                                                             | from time to time but not too often   | 1             |
|                                                                             | only occasionally                     | 0             |
| I feel cheerful                                                             | not at all                            | 3 [D]         |
|                                                                             | not often                             | 2             |
|                                                                             | sometimes                             | 1             |
|                                                                             | most of the time                      | 0             |
| I can sit at ease and feel relaxed                                          | definitely                            | 0 [A]         |
|                                                                             | usually                               | 1             |
|                                                                             | not often                             | 2             |
|                                                                             | not at all                            | 3             |
| I feel as if I am slowed down                                               | nearly all the time                   | 3 [D]         |
|                                                                             | very often                            | 2             |
|                                                                             | sometimes                             | 1             |
|                                                                             | not at all                            | 0             |
| I get a sort of frightened feeling, like "butterflies" in the stomach       | not at all                            | 0 [A]         |
|                                                                             | occasionally                          | 1             |
|                                                                             | quite often                           | 2             |
|                                                                             | very often                            | 3             |
| I have lost interest in my appearance                                       | definitely                            | 3 [D]         |
|                                                                             | I don't take so much care as I should | 2             |
|                                                                             | I may not take quite as much care     | 1             |
|                                                                             | I take just as much care as ever      | 0             |
| I feel restless as if I have to be on the move                              | very much indeed                      | 3 [A]         |
|                                                                             | quite a lot                           | 2             |
|                                                                             | not very much                         | 1             |
|                                                                             | not at all                            | 0             |
| I look forward with enjoyment to things                                     | as much as ever I did                 | 0 [D]         |
|                                                                             | rather less than I used to            | 1             |
|                                                                             | definitely less than I used to        | 2             |
|                                                                             | hardly at all                         | 3             |
| I get sudden feelings of panic                                              | very often indeed                     | 3 [A]         |
|                                                                             | quite often                           | 2             |
|                                                                             | not very often                        | 1             |
|                                                                             | not at all                            | 0             |
| I can enjoy a good book or radio or TV program                              | often                                 | 0 [D]         |
|                                                                             | sometimes                             | 1             |
|                                                                             | not often                             | 2             |
|                                                                             | very seldom                           | 3             |

A: Anxiety; D: Depression

Anxiety subscore = Sum of points for the 7 "A" items  
 Depression subscore = Sum of points for the 7 "D" items)
